# Supplementary material
Source: PubMed Central journal article supplement (PMC6356082)
Supplement: 141047_1_supp_229804_phpcv0.pdf [file 141047_1_supp_229804_phpcv0.pdf]

## **SUPPLEMENTARY FIGURES**

### **Surface loops in a single SH2 domain are capable of encoding the spectrum of specificity of the SH2 family**

Huadong Liu, Haiming Huang, Courtney Voss, Tomonori Kaneko, Wen Qin, Sachdev Sidhu and Shawn S-C. Li

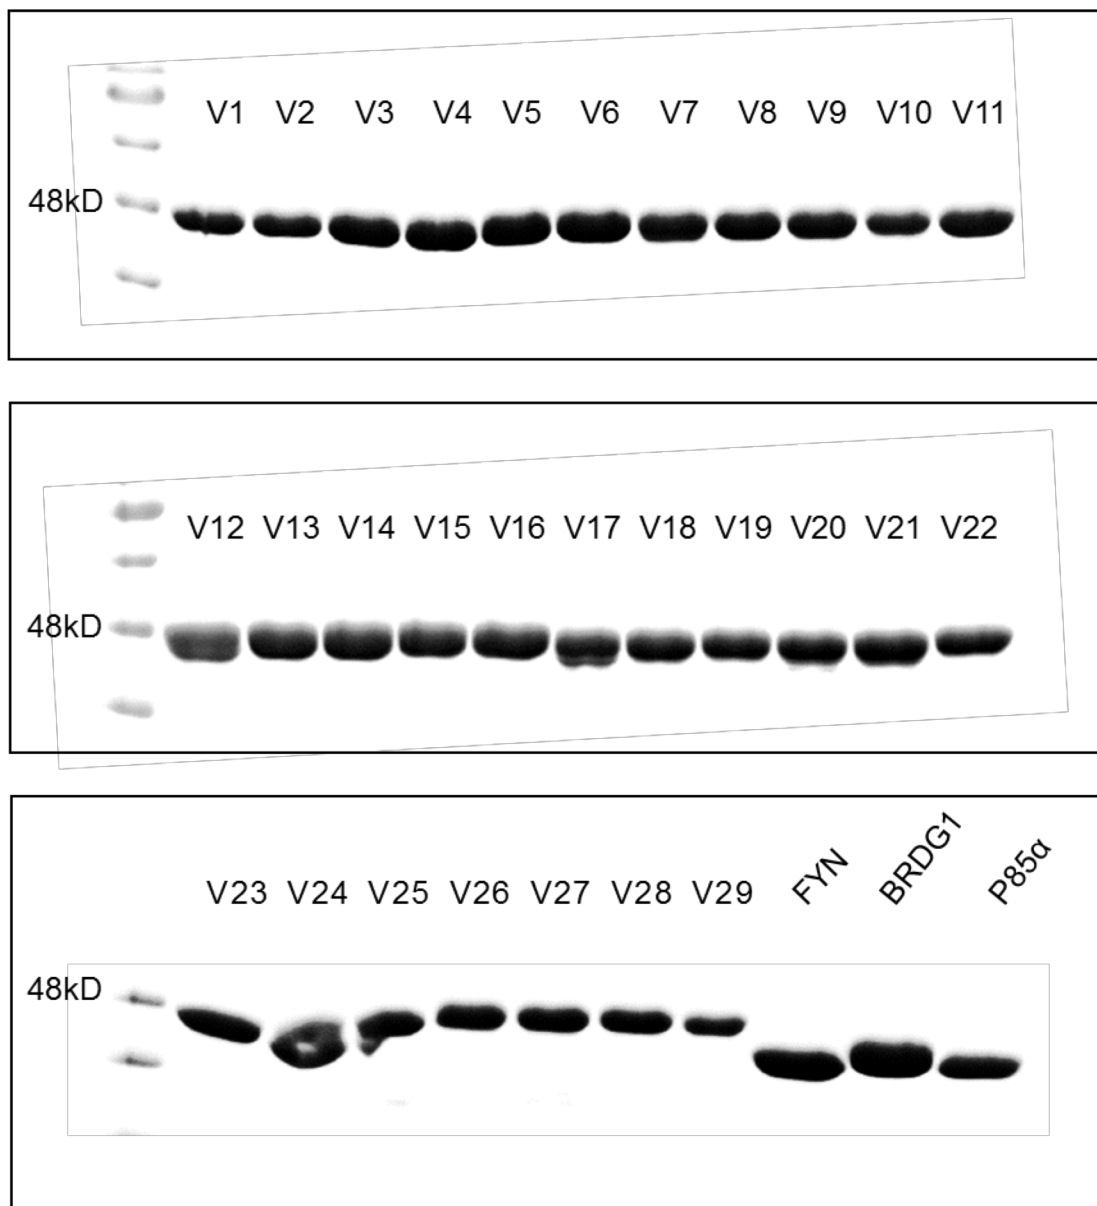

**Figure S1:** Coomassie blue staining SDS-PAGE gel of Fyn SH2 variants and wild-type SH2 domains from Fyn, BRGR1, or PI3K(p85 $\alpha$ ). The proteins, in (His)<sub>6</sub>-GST fusion, were expressed in *E-coli* and purified by nickel column.

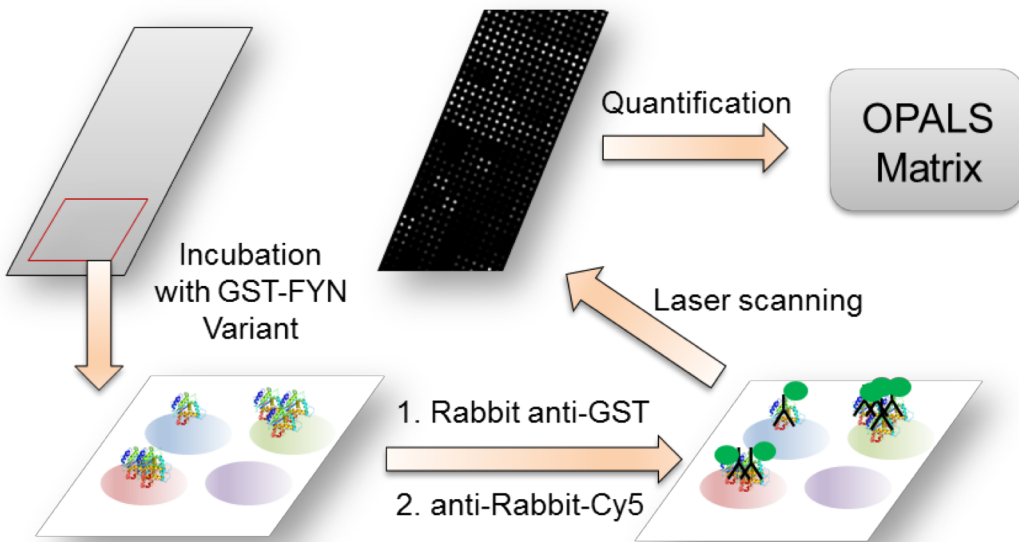

**Figure S2:** A flowchart of the Oriented Peptide Array Library (OPAL) strategy. OPAL slides were probed by different GST-SH2 domains or variants (mutants), followed by detection with anti-GST antibody and visualization with a Cy5-labeled secondary antibody.

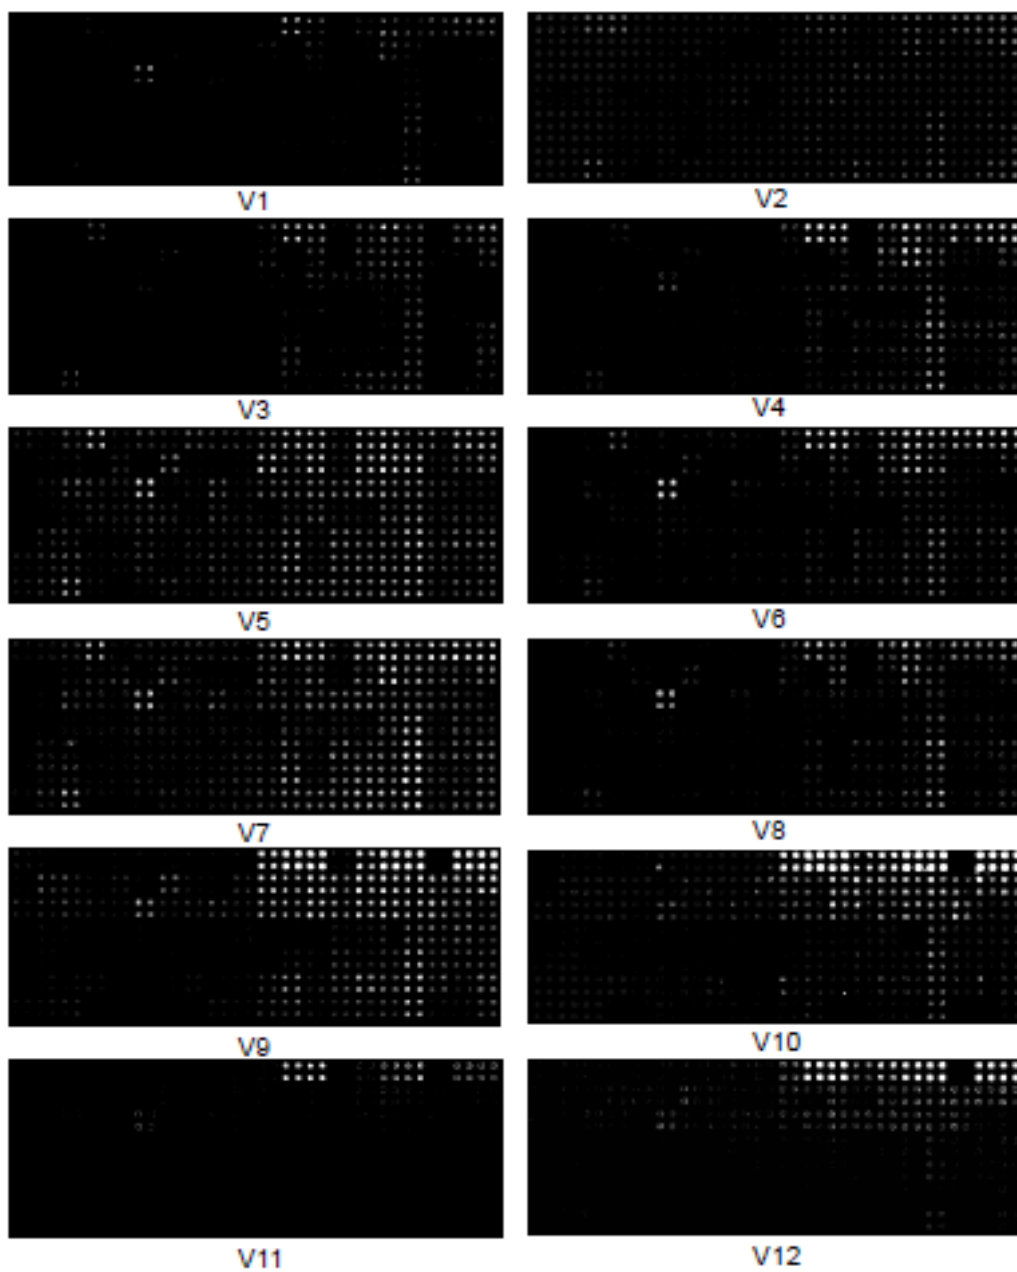

**Figure S3a:** Images of OPAL slides probed by different variants.

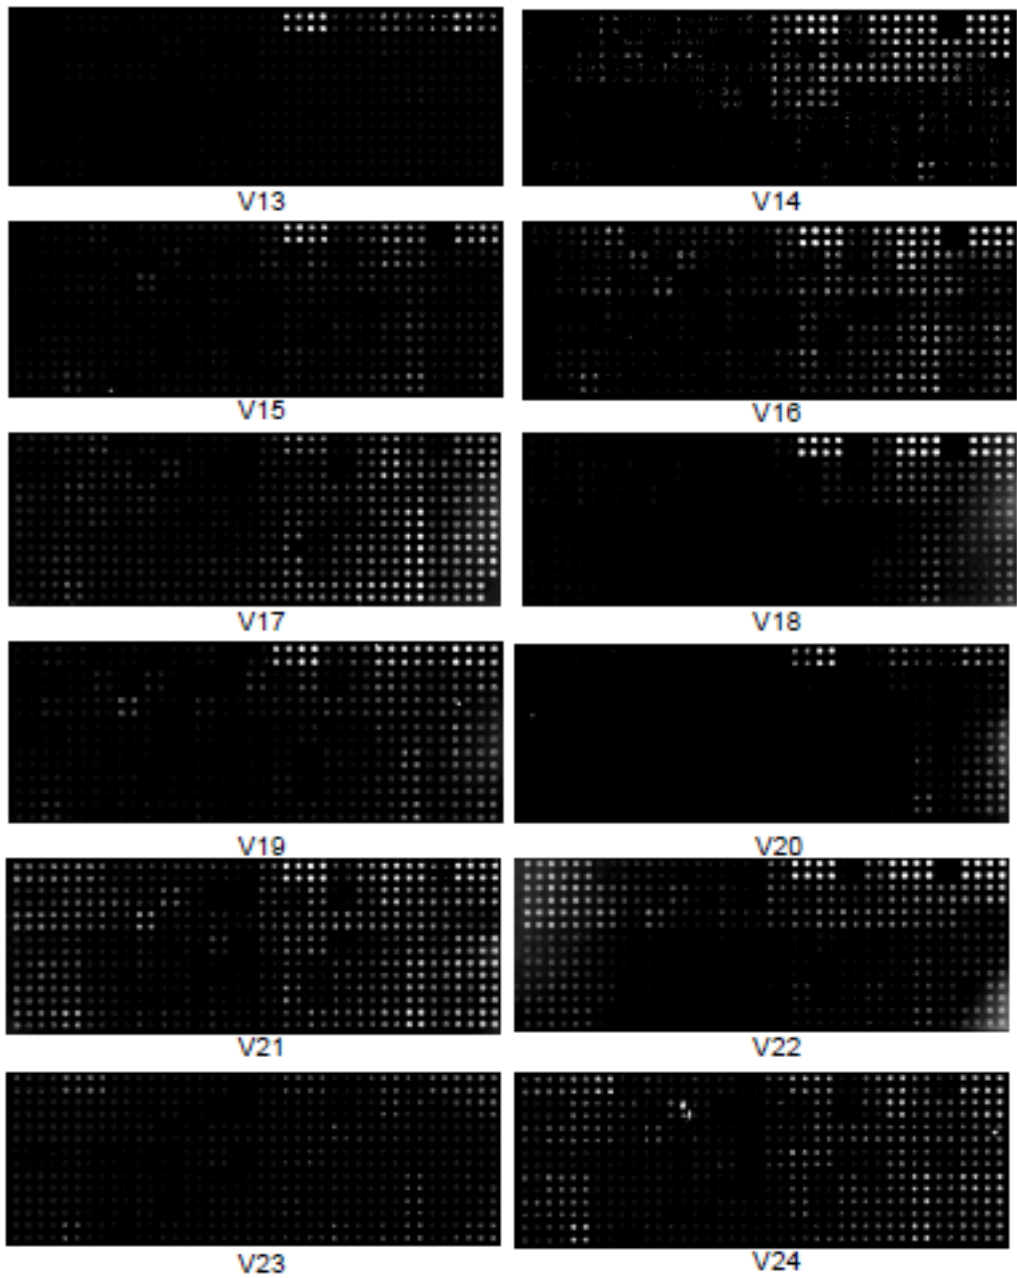

**Figure S3b:** Images of OPAL slides probed by different variants.

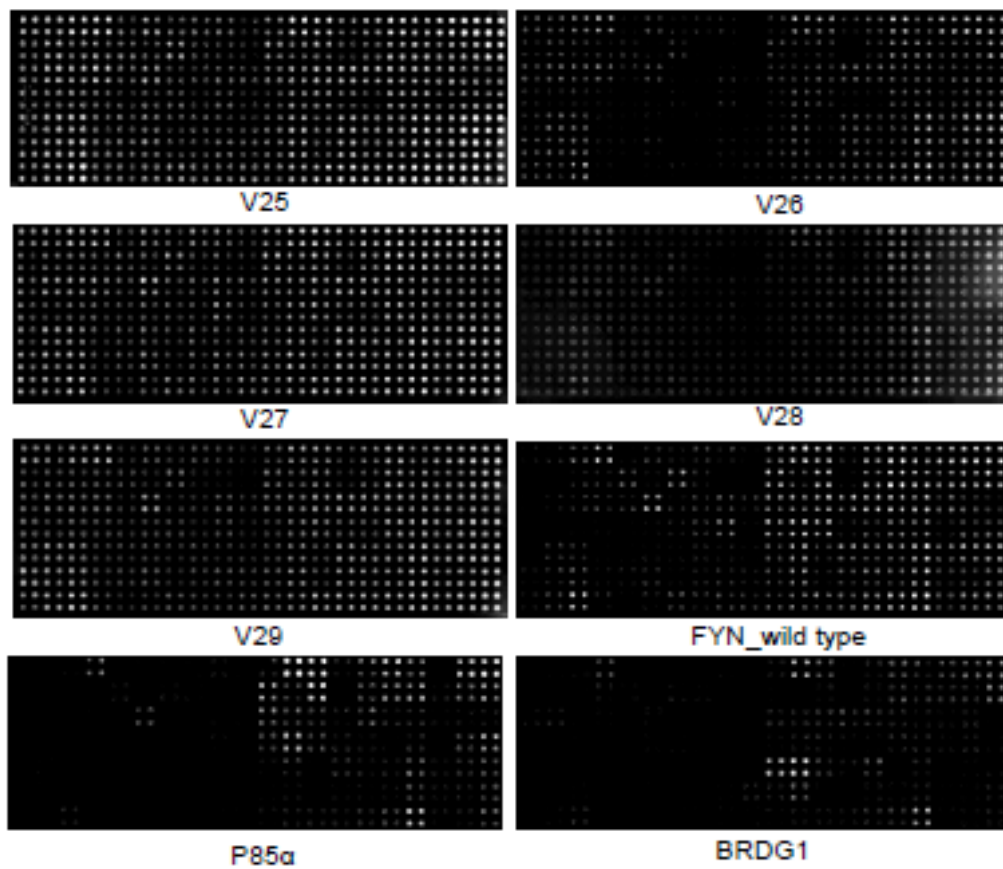

**Figure S3c:** Images of OPAL slides probed by different wt SH2 domains or variants.

### P-1 Heat map

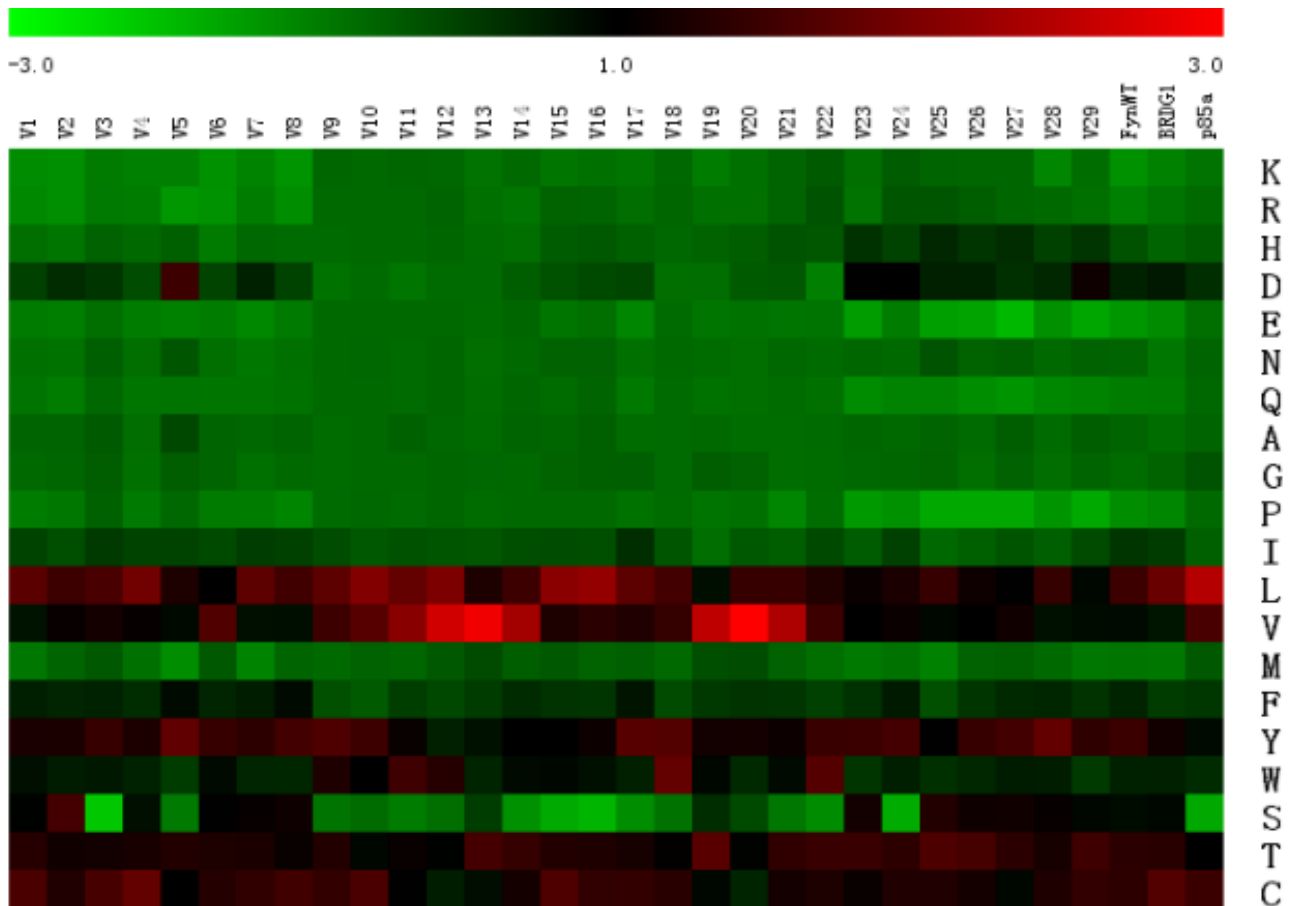

**Figure S4a:** Heat map of variant selectivity for positions P-1 based on the corresponding Z scores on OPAL. Color was generated according to the Z-score (i.e., green, small Z-score; red, large Z-score).

### P+1 Heat map

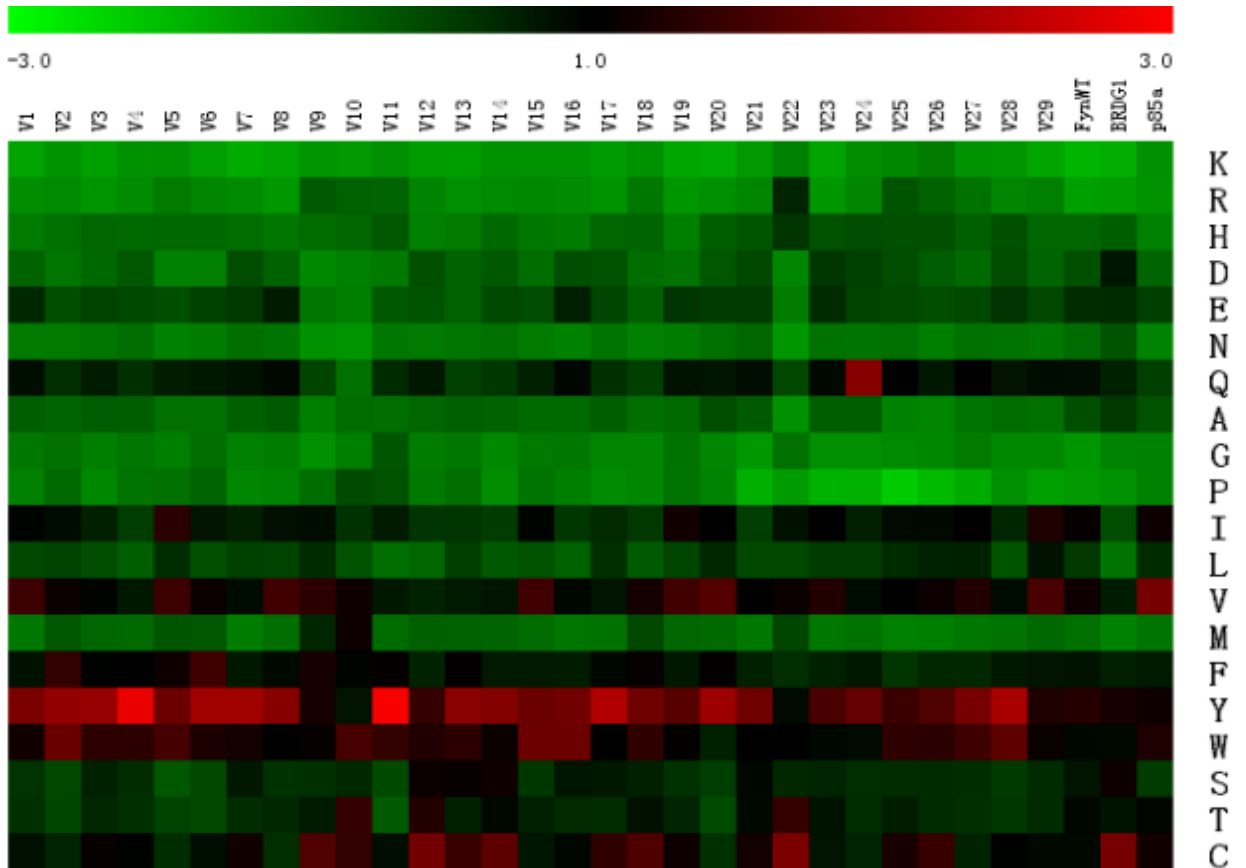

**Figure S4b:** Heat map of variant selectivity for positions P+1 based on the corresponding Z scores on OPAL. Color was generated according to the Z-score (i.e., green, small Z-score; red, large Z-score).



### P+3 Heat map

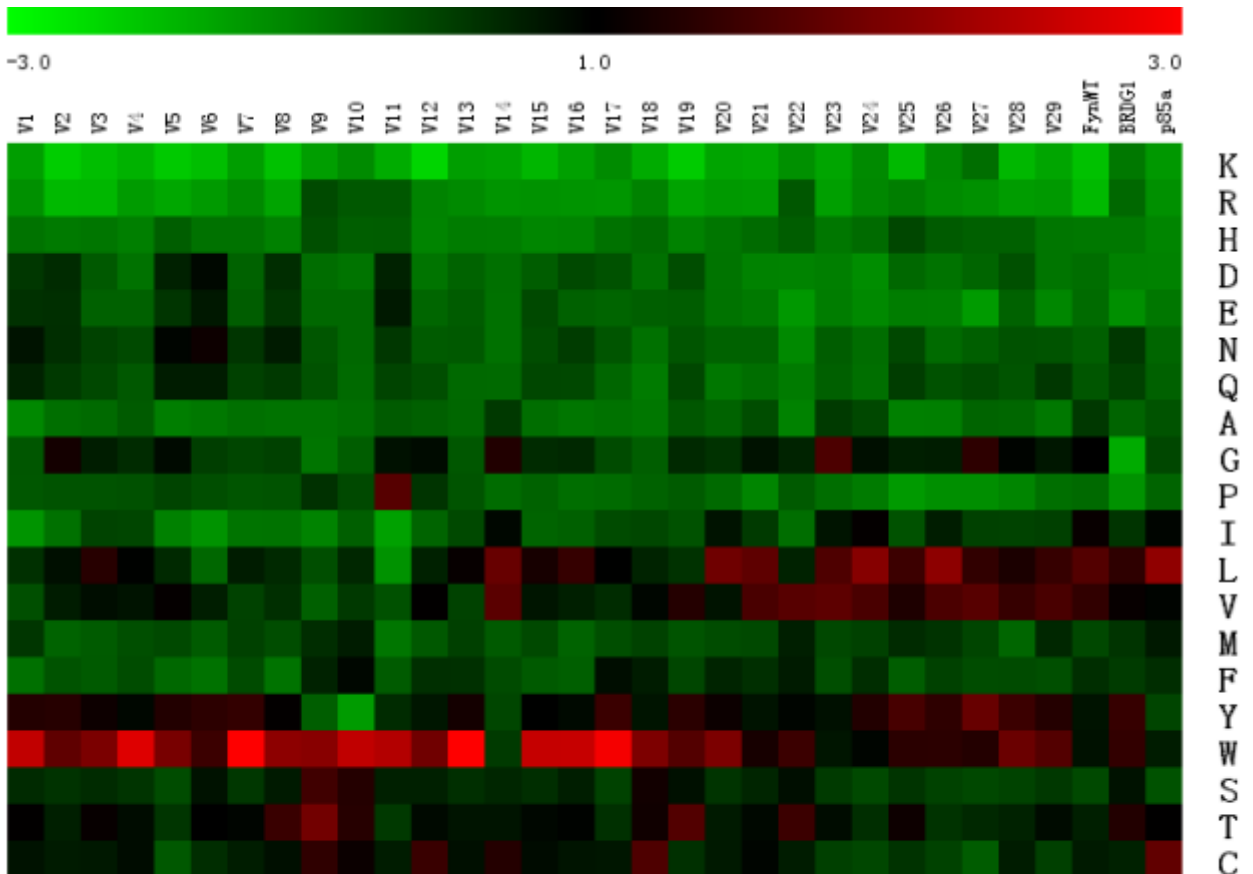

**Figure S4c:** Heat map of variant selectivity for positions P+1 based on the corresponding Z scores on OPAL. Color was generated according to the Z-score (i.e., green, small Z-score; red, large Z-score).

### P+4 Heat map

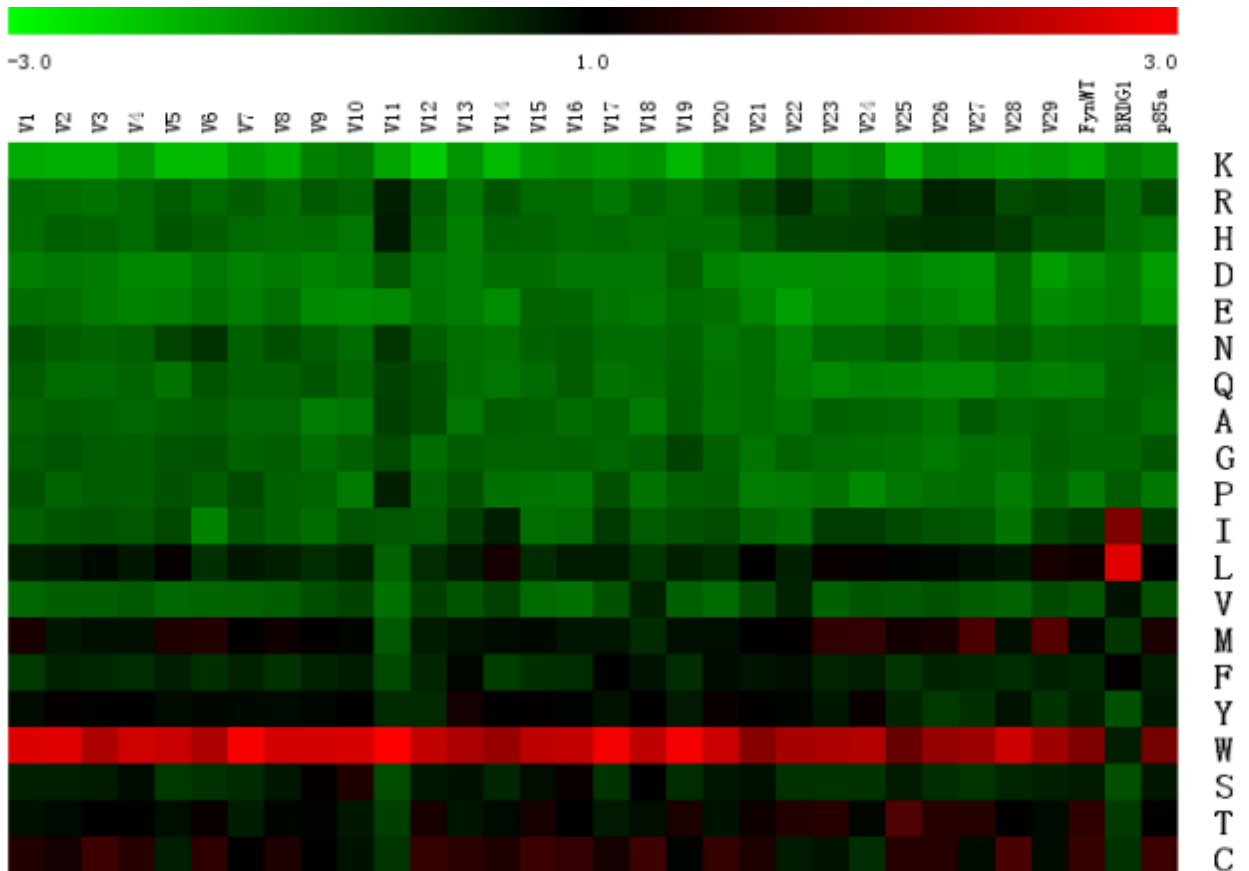

**Figure S4d:** Heat map of variant selectivity for positions P+4 based on the corresponding Z scores on OPAL. Color was generated according to the Z-score (i.e., green, small Z-score; red, large Z-score).

### P +5 Heat map

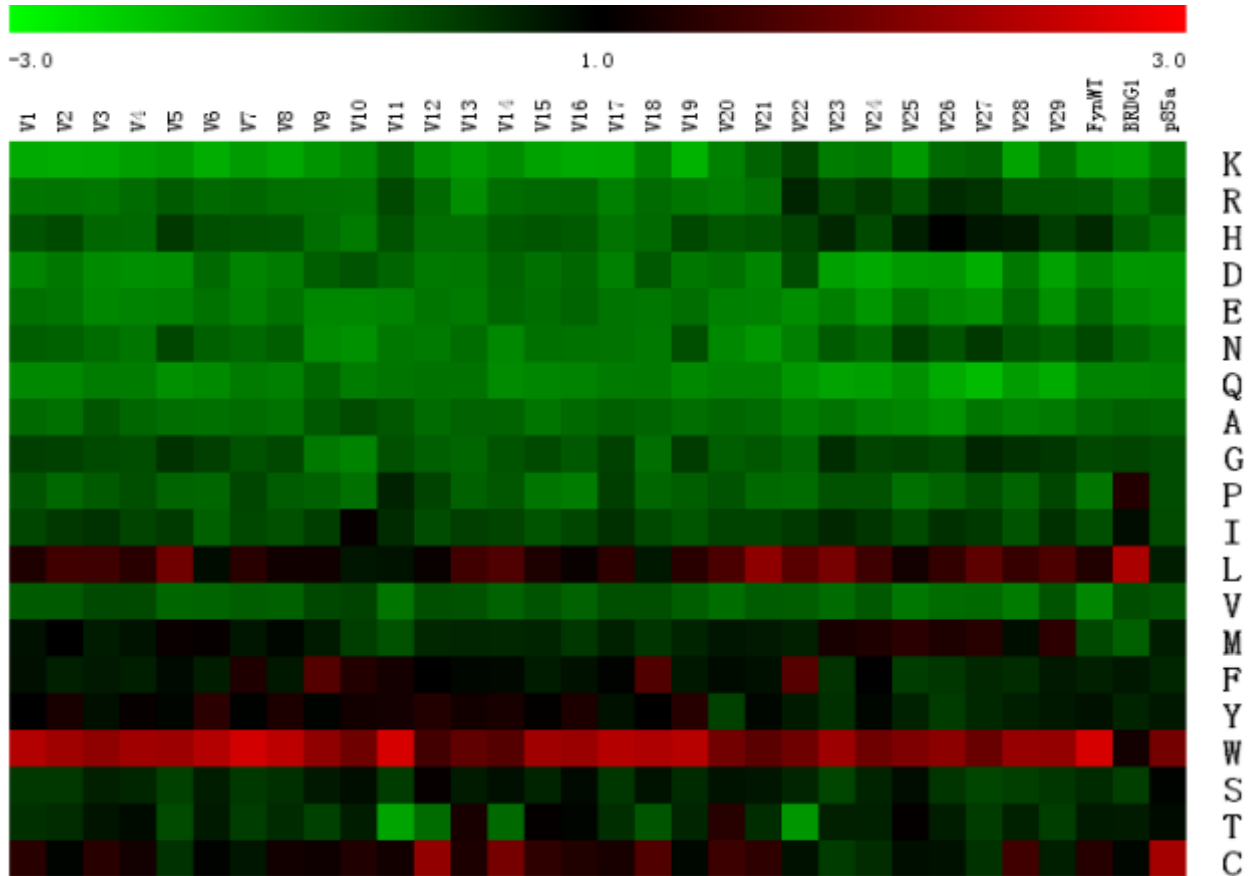

**Figure S4e:** Heat map of variant selectivity for positions P+5 based on the corresponding Z scores on OPAL. Color was generated according to the Z-score (i.e., green, small Z-score; red, large Z-score).

### P+6 Heat map

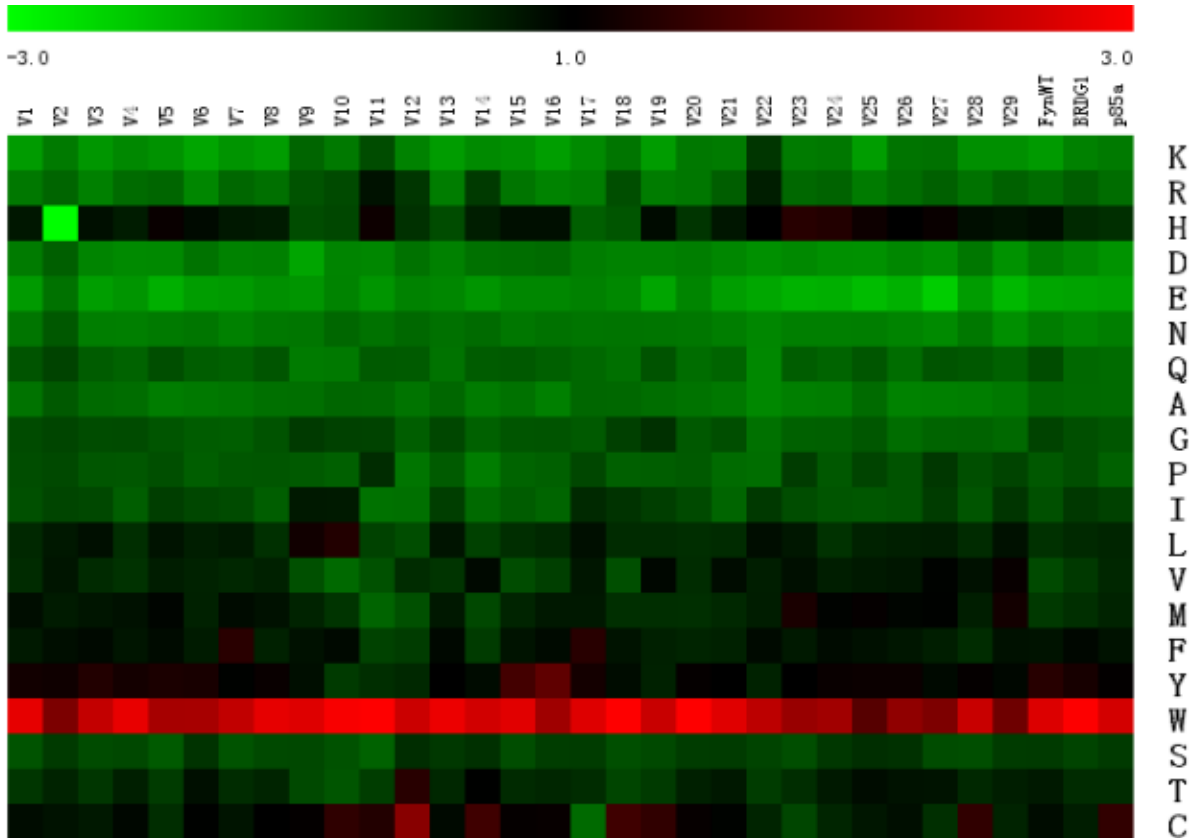

**Figure S4f:** Heat map of variant selectivity for positions P+6 based on the corresponding Z scores on OPAL. Color was generated according to the Z-score (i.e., green, small Z-score; red, large Z-score).

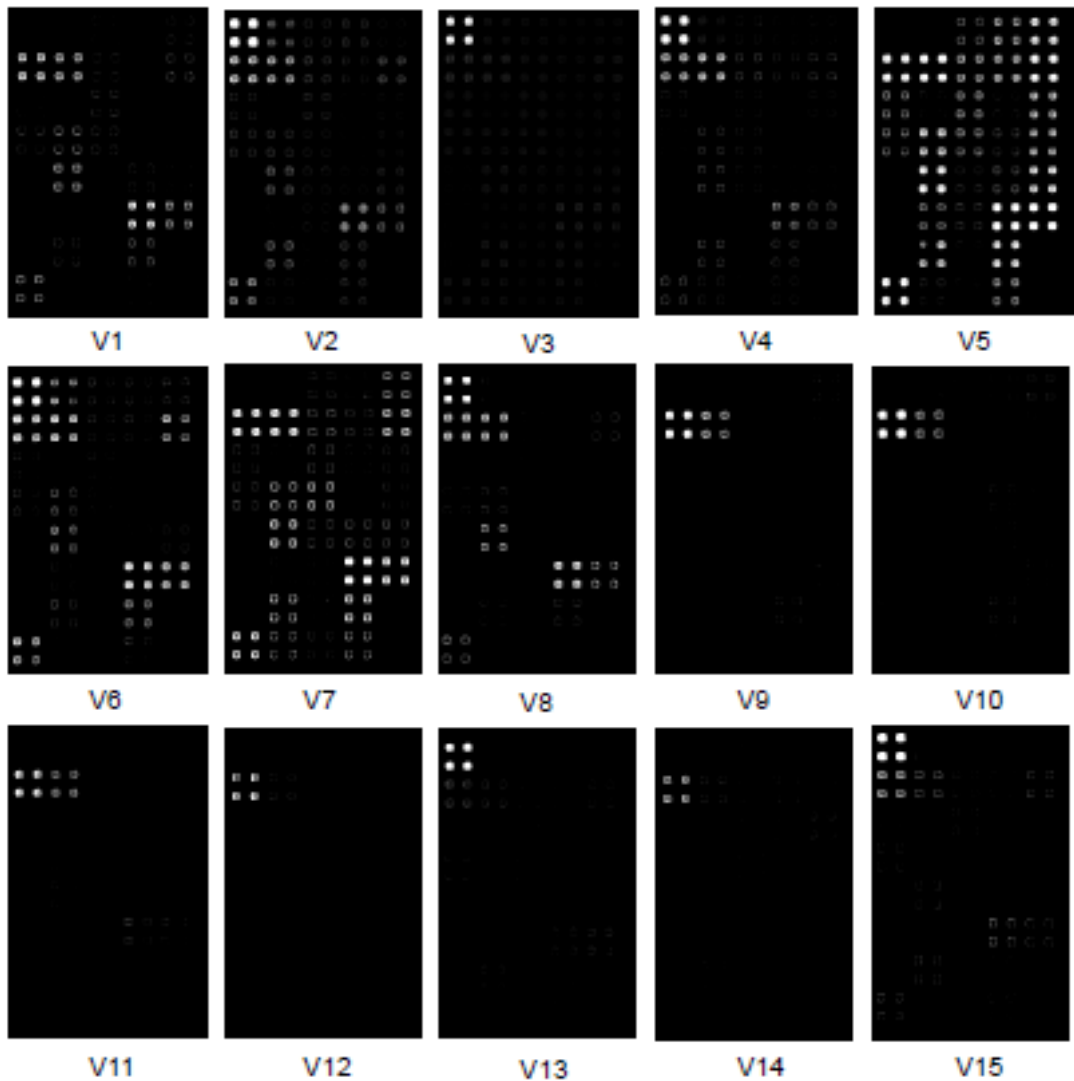

**Figure S5a.** Peptide ligand array probed by different variants. N-terminal biotin-labeled peptides were incubated with neutravadin. The resulting complex was printed on the slide in quadruplicates. Each slide was probed by a different GST fused FYN-SH2 variant or a control GST-SH2 domain. A rabbit-anti-GST antibody was used to detect the bound proteins, followed by imaging with a Cy5-labeled secondary antibody. Shown are images in a laser scanner.

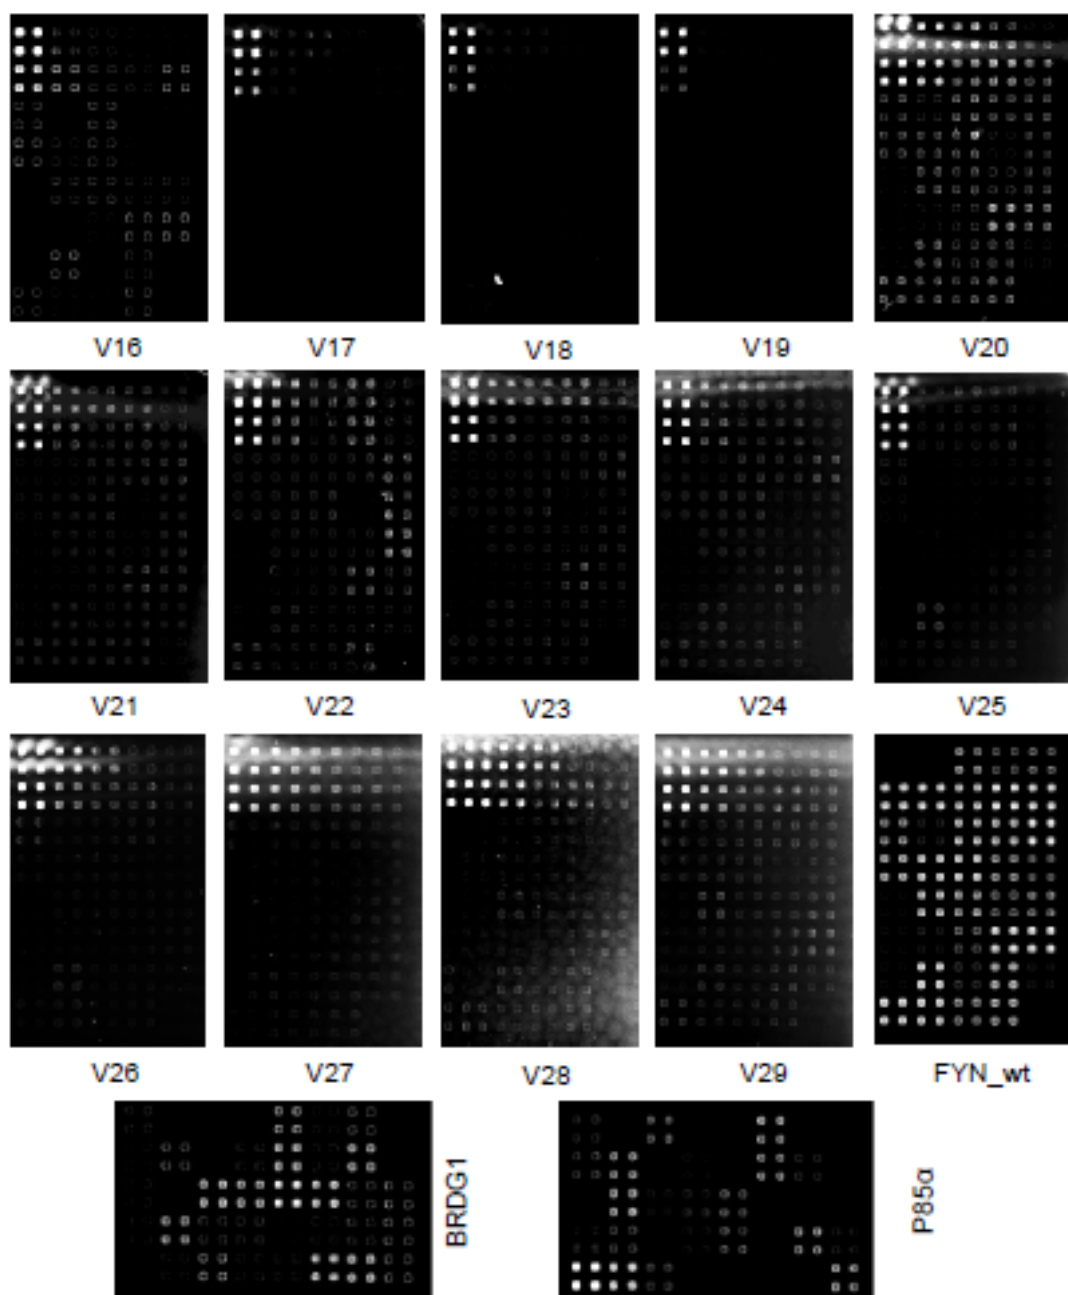

**Figure S5b.** Images of peptide ligand arrays probed by different Fyn SH2 variants or control wt SH2 domains.

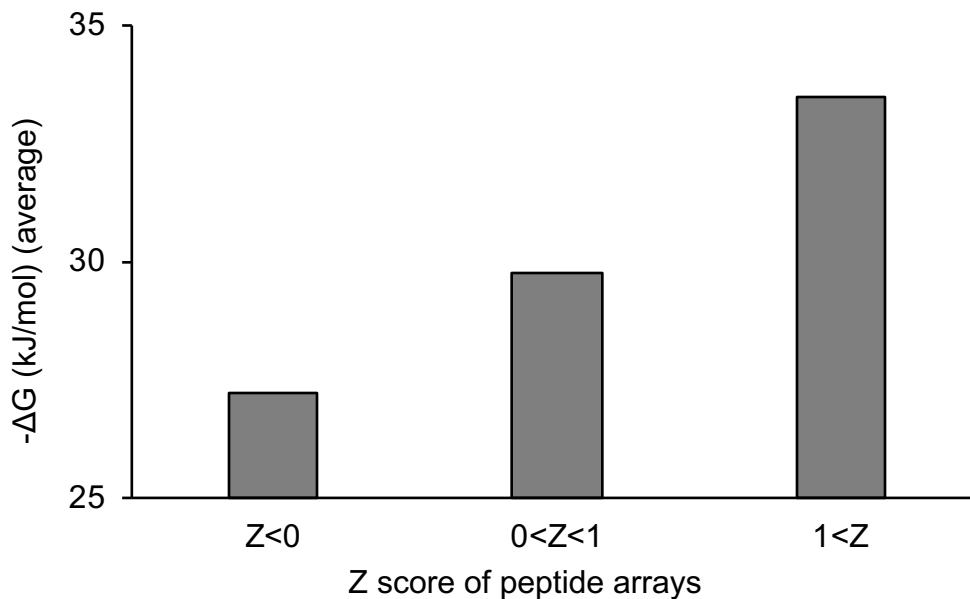

**Figure S6:** In-solution peptide-variant binding affinities correlate with the peptide array data. The peptide-SH2 variant binding free energy ( $\Delta G$ ) were calculated from the corresponding equilibration constant ( $K_d$ ) derived from fluorescence polarization measurements according to the equation  $\Delta G^\circ = -RT \ln(K_d)$ . Shown is a plot of the average  $-\Delta G^\circ$  value for SH2 variants grouped according to their Z scores on the peptide array. The peptide array data matches well with in-solution binding assay—that is, the higher Z score the greater the binding affinity.

## FynWT

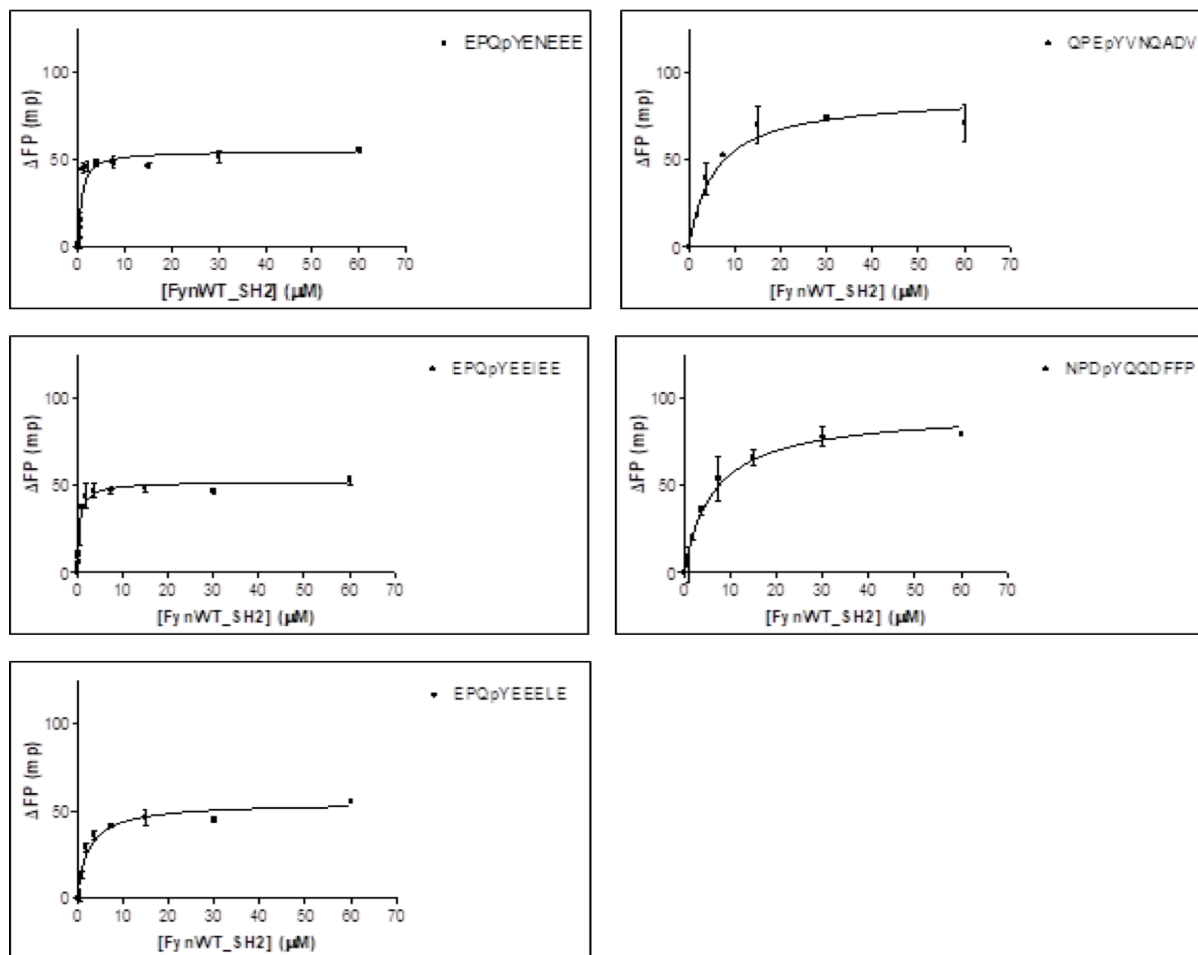

**Figure S7a:** Representative binding curves for the wt Fyn SH2 domain to different peptides obtained from fluorescence polarization measurements (see also Table 1)



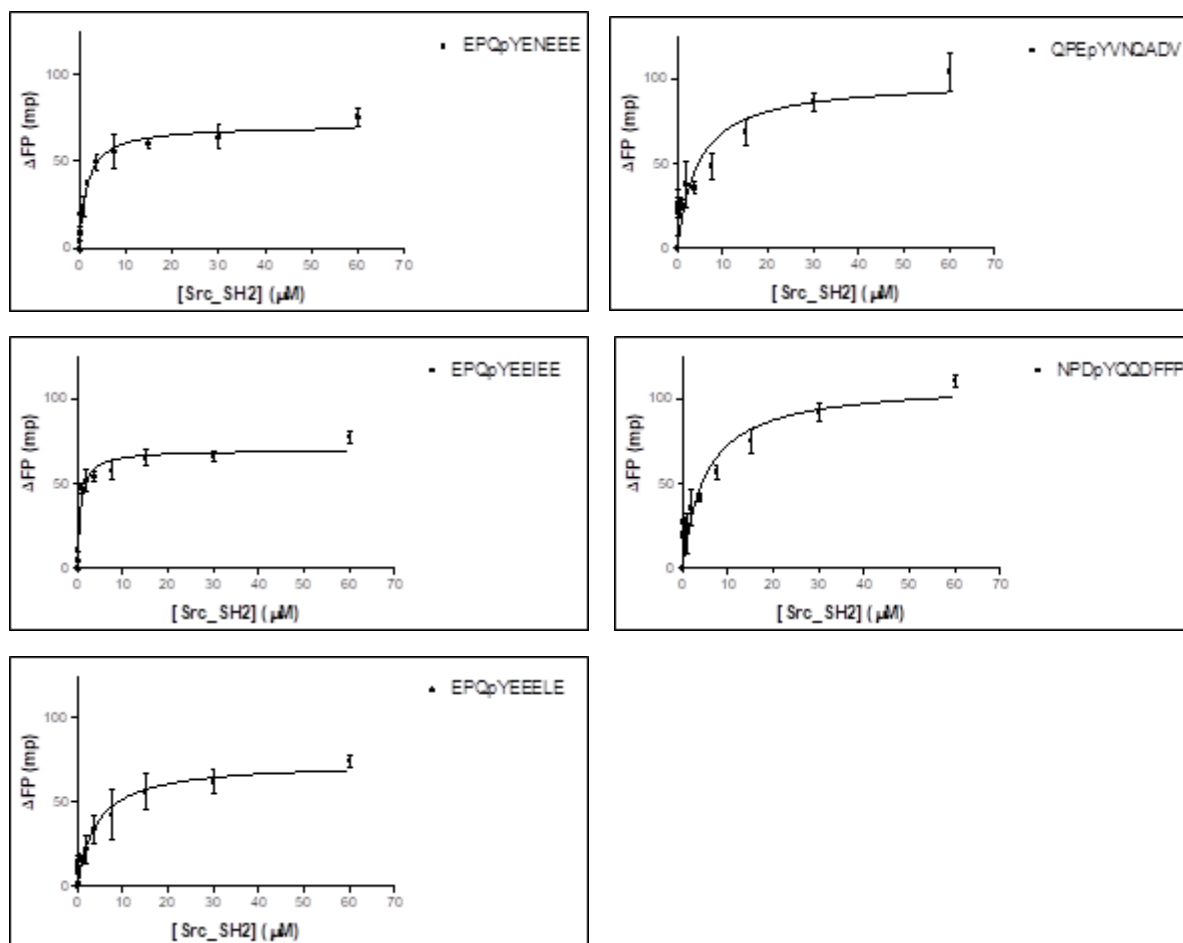

**Figure S7b:** Representative binding curves for the wt Src SH2 domain to different peptides (see also Table 1)

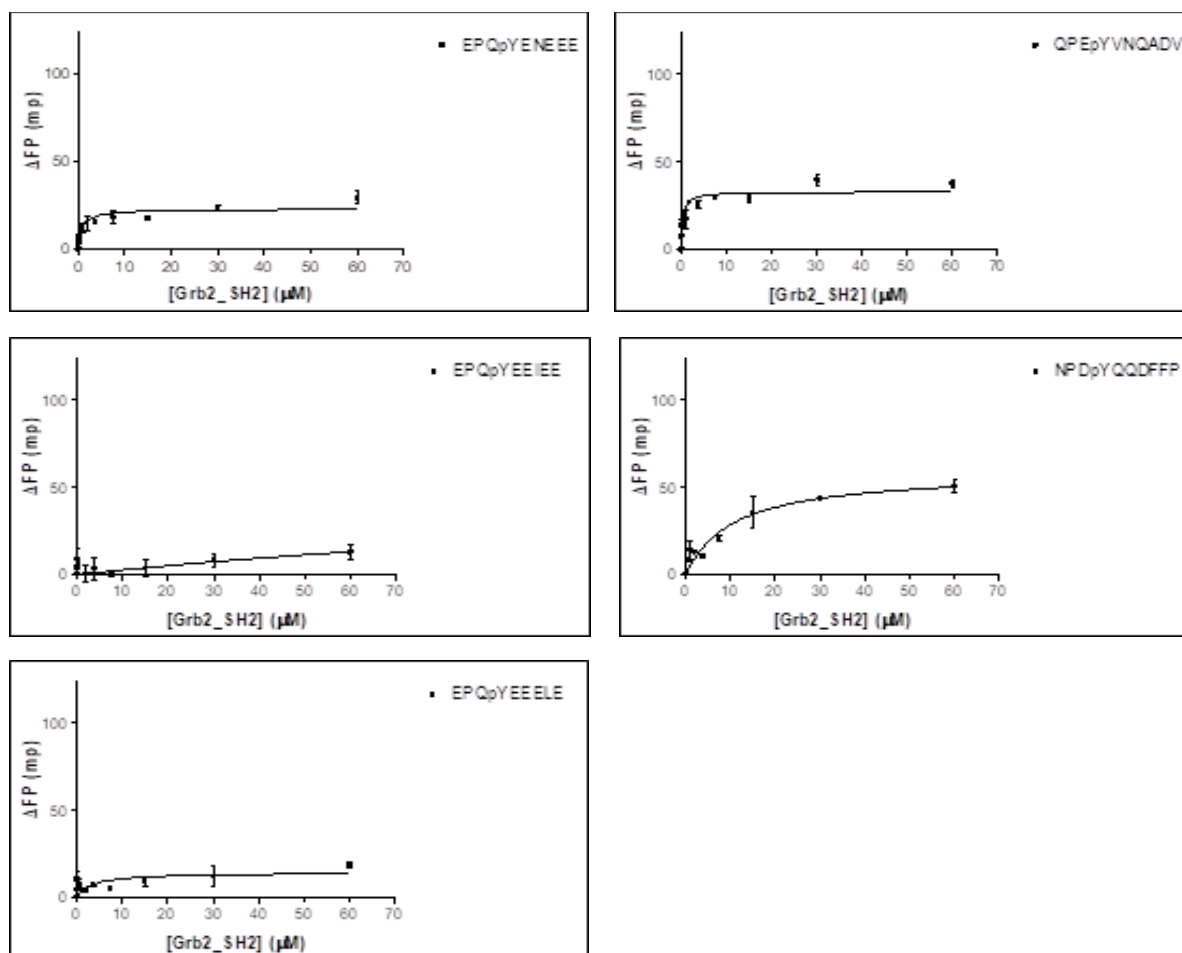

**Figure S7c:** Representative binding curves for the wt Grb2 SH2 domain to different peptides (see also Table 1)

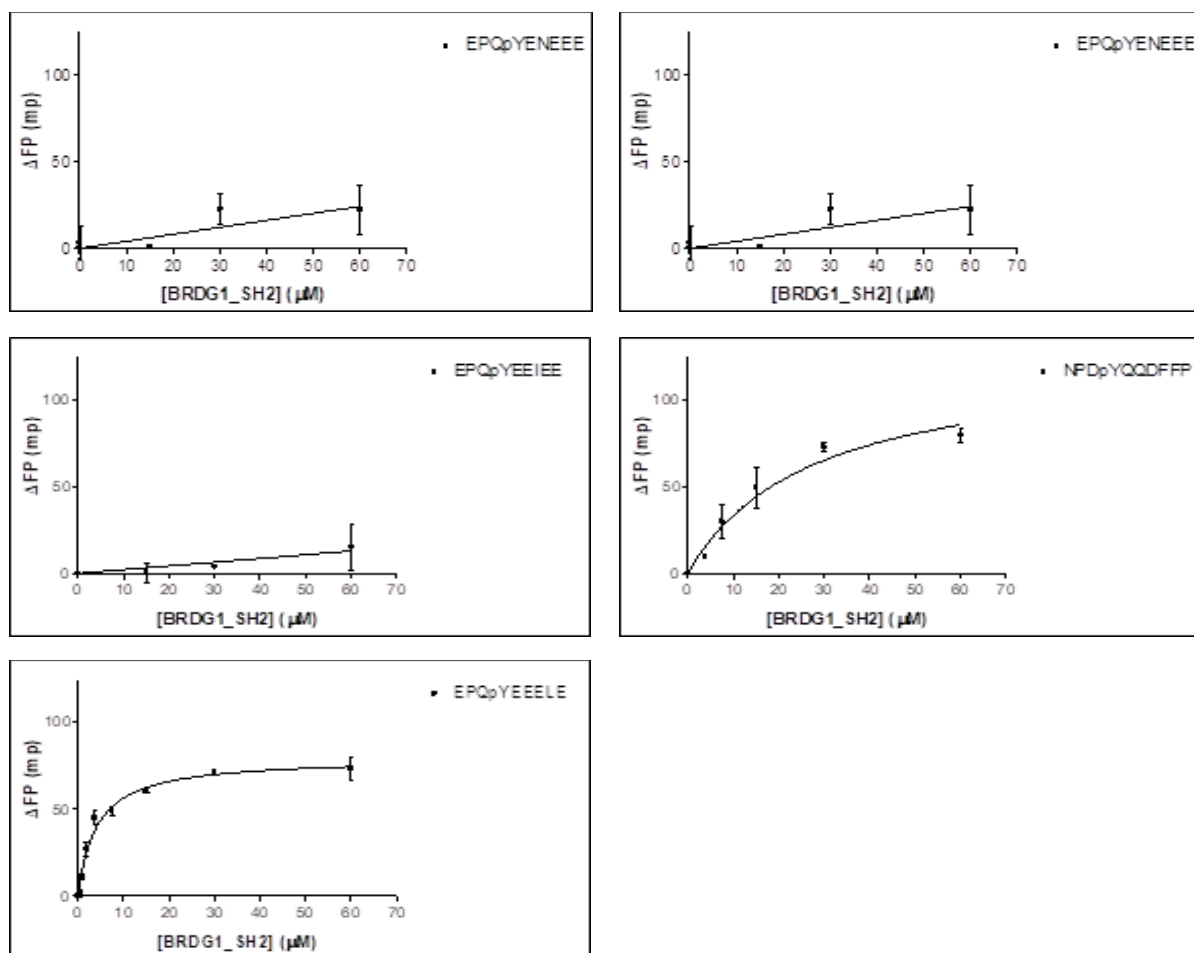

**Figure S7d:** Representative binding curves for the wt BRDG1 SH2 domain to different peptides (see also Table 1)

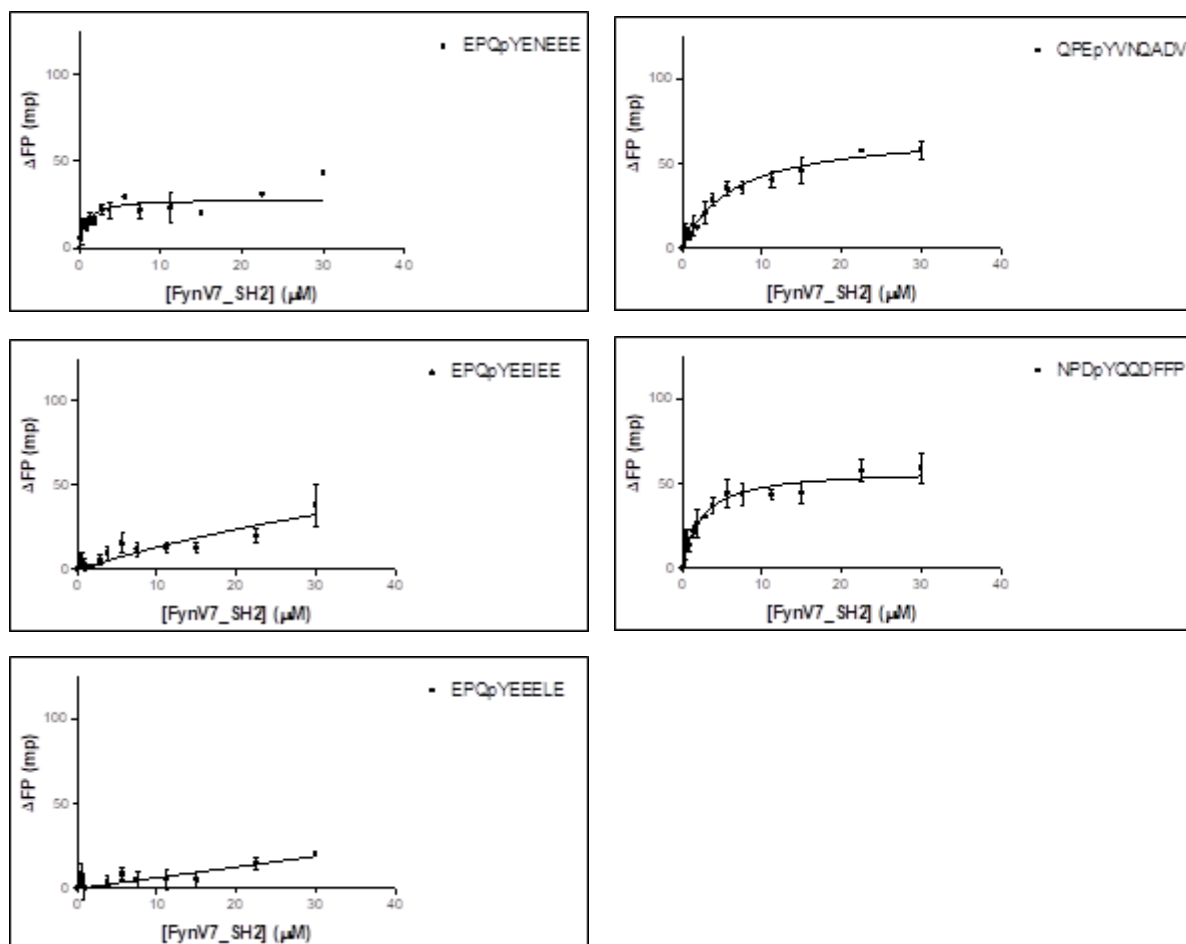

**Figure S7e:** Representative binding curves for the Variant #7 to different peptides (see also Table 1)

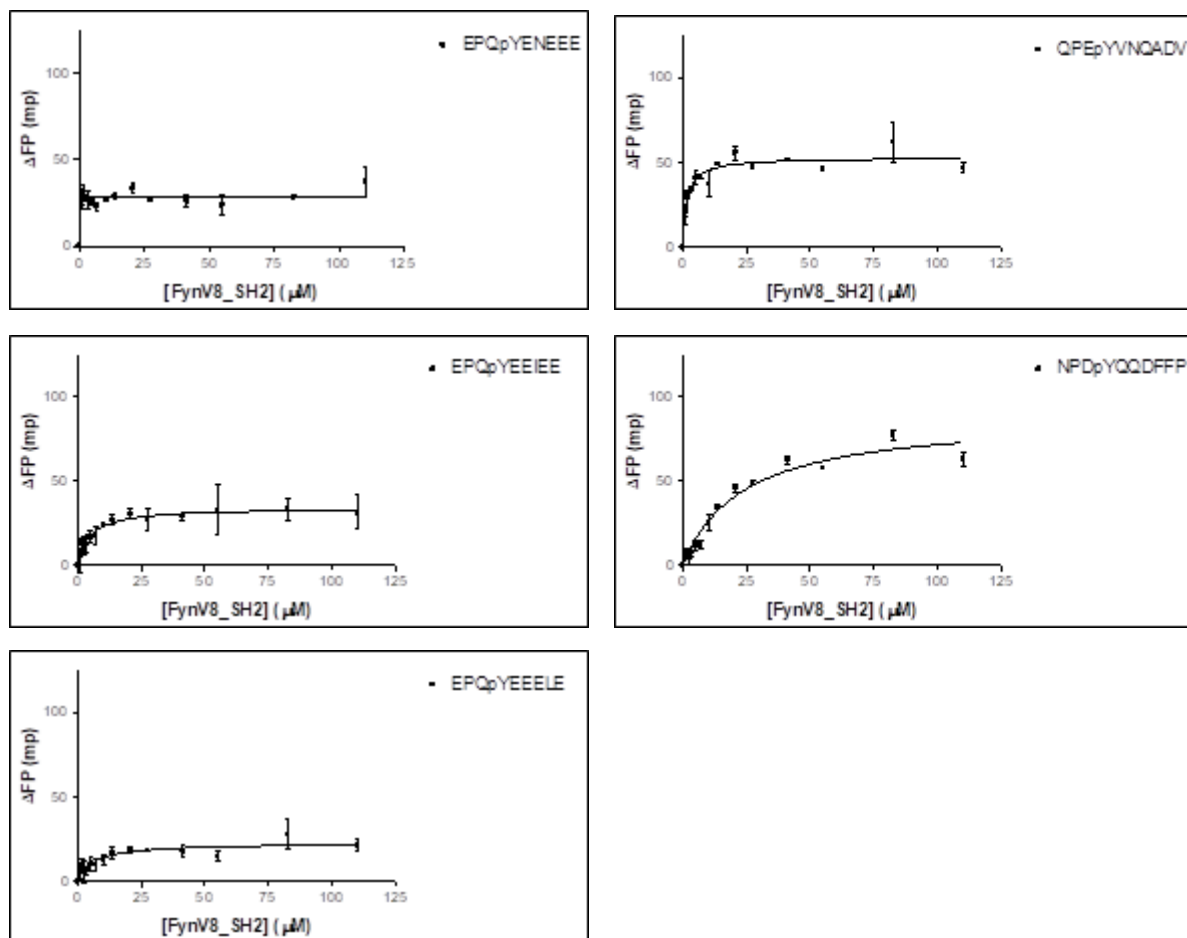

**Figure S7f:** Representative binding curves for the Variant #8 to different peptides (see also Table 1)

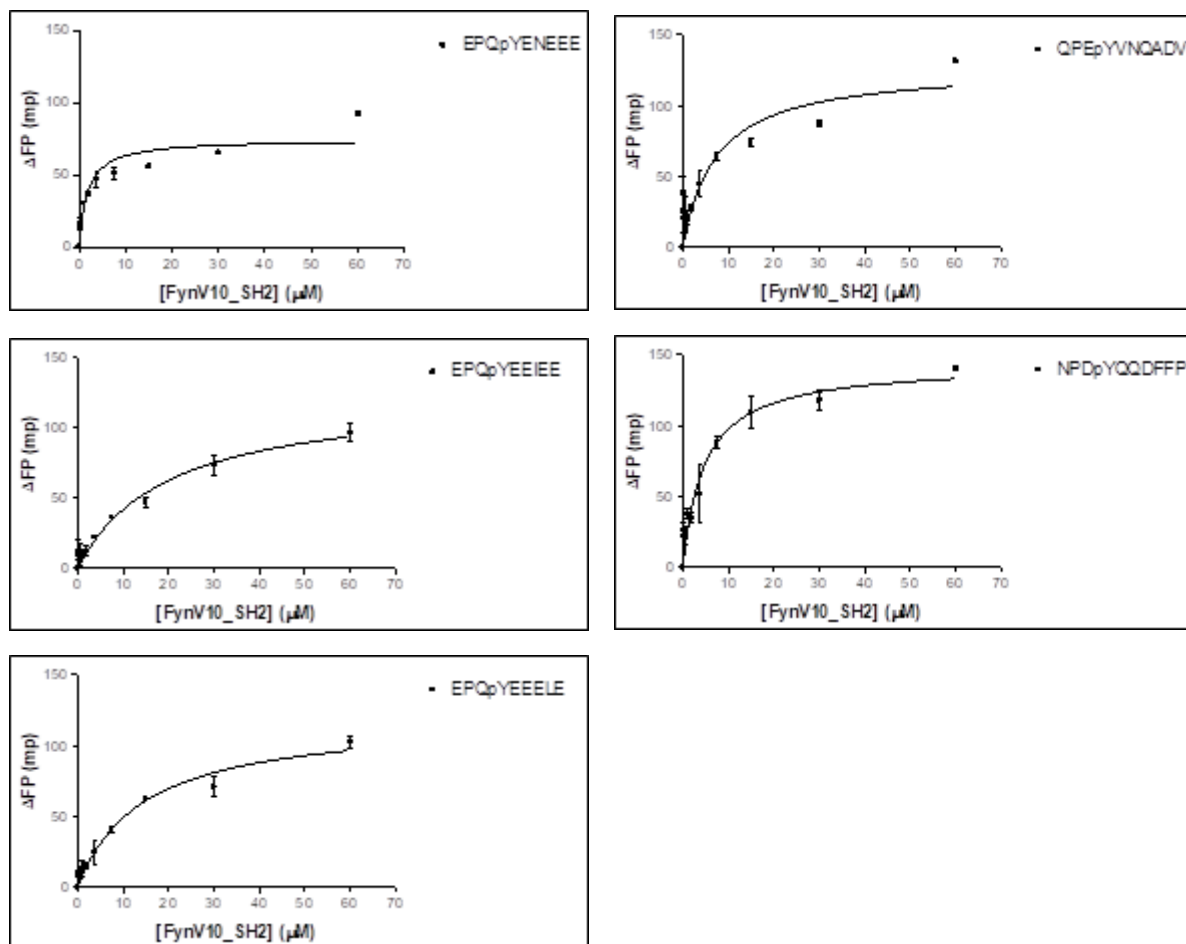

**Figure S7g:** Representative binding curves for the Variant #10 to different peptides (see also Table 1)

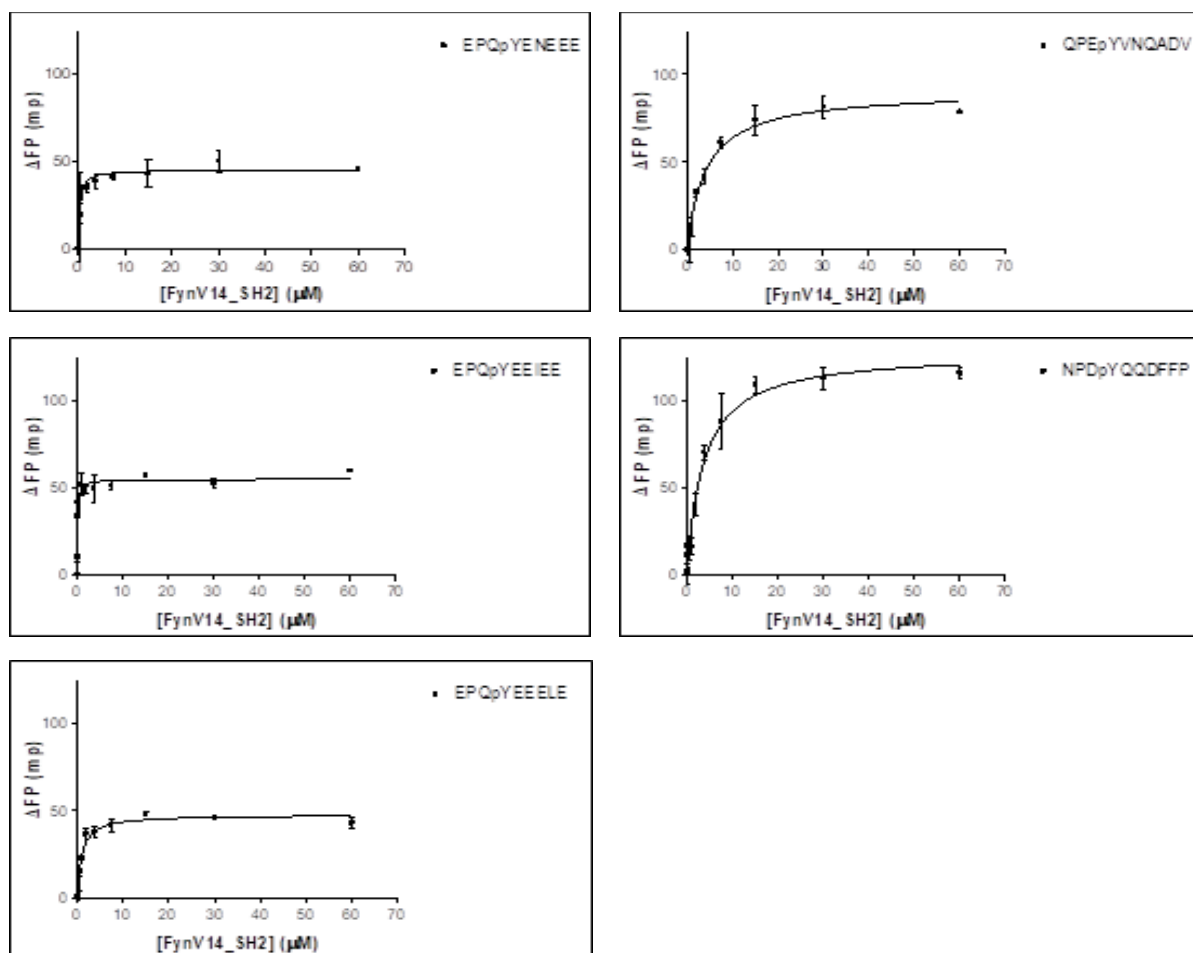

**Figure S7h:** Representative binding curves for the Variant #14 to different peptides (see also Table 1)

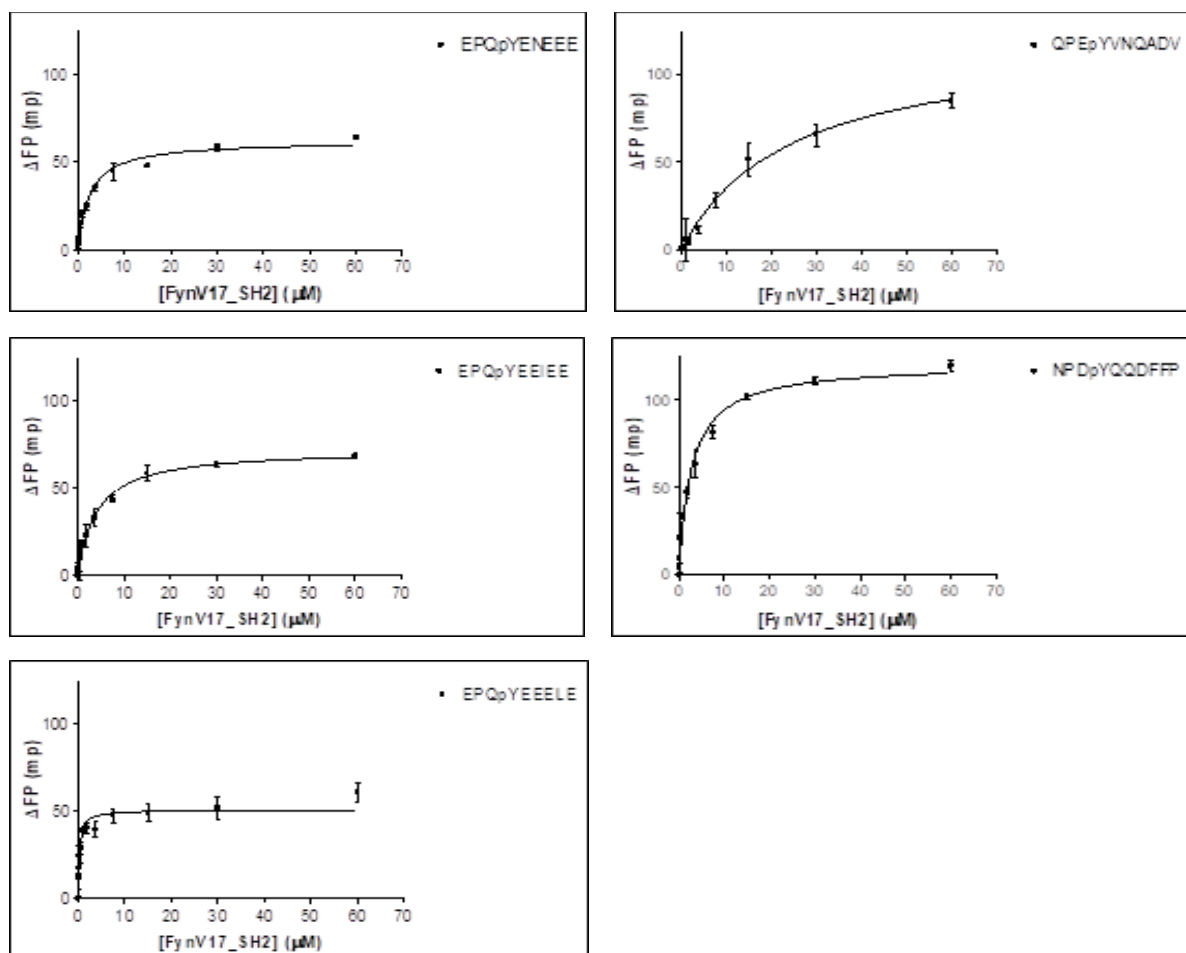

**Figure S7i:** Representative binding curves for the Variant #17 to different peptides (see also Table 1)



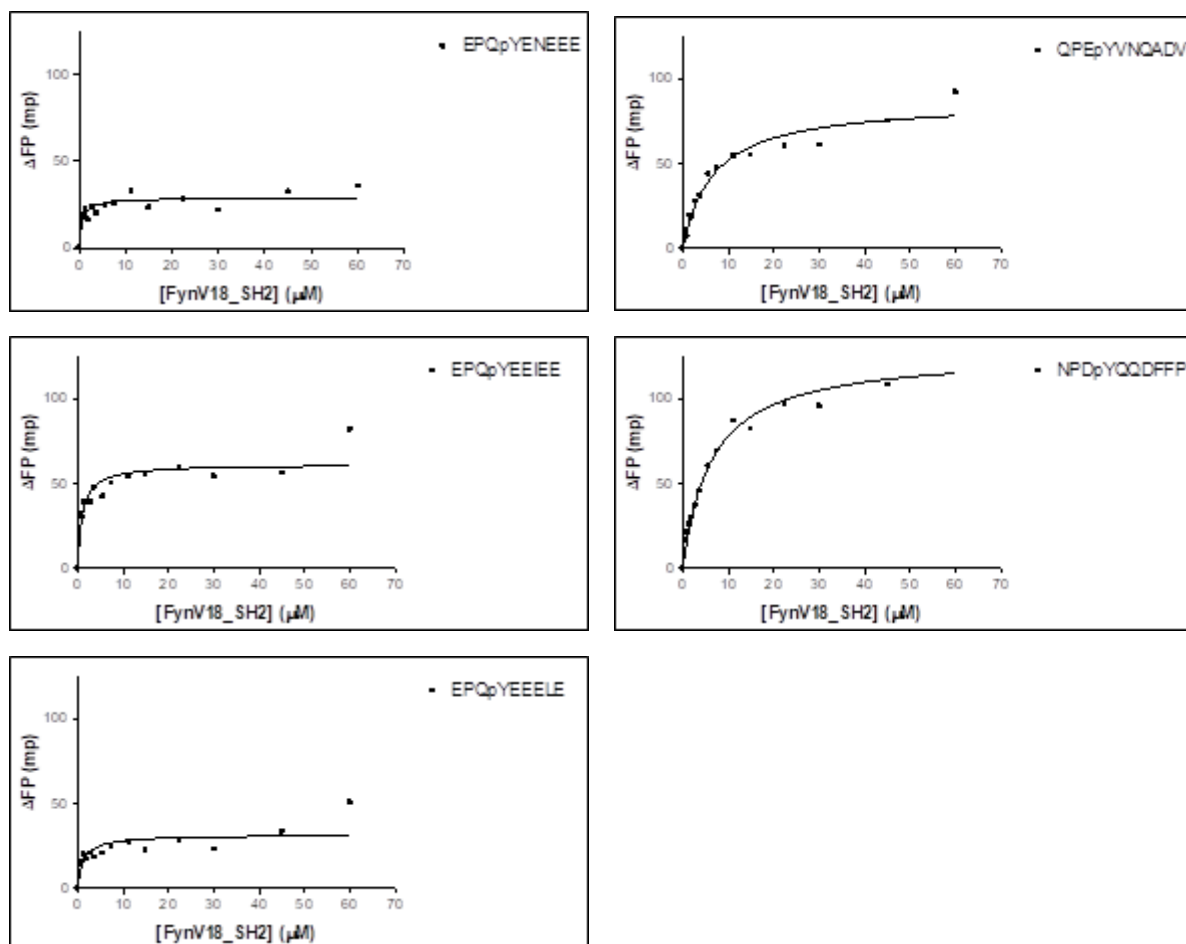

**Figure S7j:** Representative binding curves for the Variant #18 to different peptides (see also Table 1)

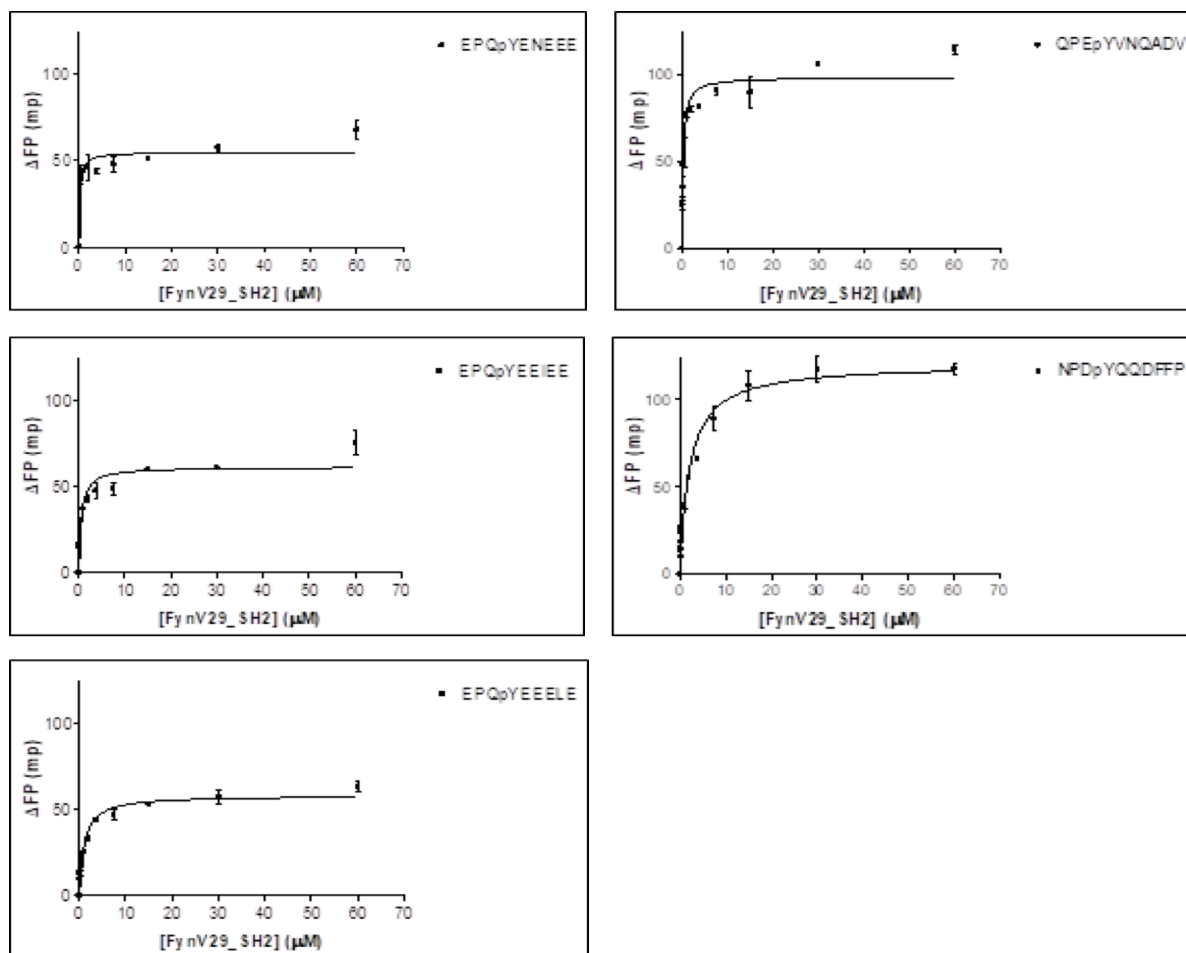

**Figure S7k:** Representative binding curves for the Variant #29 to different peptides (see also Table 1)

**Supplementary Table 1. A count of unique phage variants identified by different bait peptides**

| Bait peptide             | Sequence              | Motif      | Total variants | Library 3+3 | Library 3+x |
|--------------------------|-----------------------|------------|----------------|-------------|-------------|
| pYEEI-variant_2N#        | EPQpYEN <u>EEEE</u>   | P+2N       | 0              | 0           | 0           |
| pYEEI-variant_3I#        | EPQpYEE <u>IEE</u>    | P+3I       | 11             | 5           | 6           |
| pYEEI-variant_4L#        | EPQpYEE <u>ELE</u>    | P+4L       | 14             | 8           | 6           |
| VEGFR1-pY1213#           | DVRpYV <u>NAAKF</u>   | P+2N       | 0              | 0           | 0           |
| ShcA-pY239#              | DHQpYY <u>NDAPG</u>   | P+2N       | 20             | 8           | 12          |
| β2-adrenoreceptor-pY350# | SKApY <u>GN</u> GASS  | P+2N       | 0              | 0           | 0           |
| PDGFRβ-pY716#            | AELpYS <u>NAA</u> PV  | P+2N       | 14             | 8           | 6           |
| ErbB2-pY1139#            | QPEpYV <u>NQADV</u>   | P+2N       | 2              | 1           | 1           |
| TIE2-pY1102              | RKTpYV <u>N</u> TTLY  | P+2N       | 0              | 0           | 0           |
| FCERB-pY219              | DRVpYEE <u>L</u> NIYS | P+3L       | 0              | 0           | 0           |
| SIG11-pY668              | TTEpYSE <u>I</u> KIHT | P+3I       | 5              | 5           | 0           |
| CD79A-pY188              | ENLpYEG <u>L</u> NLDD | P+3L       | 14             | 7           | 7           |
| CEA20-pY578              | ESIpYEV <u>L</u> GMQQ | P+3L       | 4              | 3           | 1           |
| TRAF7-pY275*             | QDTpYETH <u>L</u> ET  | P+4L       | 2              | 2           | 0           |
| MALT1-pY470*             | RNDpYDD <u>T</u> PI   | P+4I       | 3              | 0           | 3           |
| RSKL-pY423               | YQHpYDLD <u>L</u> KD  | P+4L       | 0              | 0           | 0           |
| B-raf-pY85*              | YEEpYTSK <u>L</u> DA  | P+4L       | 0              | 0           | 0           |
| <i>EGFR-pY869</i>        | EKEpYHA <u>E</u> GGK  |            | 0              | 0           | 0           |
| <i>EGFR-pY915</i>        | SKPpYDG <u>I</u> PAS  | P+3I, P+4P | 0              | 0           | 0           |
| <i>EGFR-pY944#</i>       | IDVpYMI <u>M</u> VKA  | P+3M, P+4V | 0              | 0           | 0           |
| EGFR-pY978               | PQRpYLVI <u>I</u> QGD | P+3I       | 4              | 2           | 2           |
| EGFR-pY998               | SNFpYRA <u>L</u> MDE  | P+3L, P+4M | 3              | 3           | 0           |
| EGFR-pY1016              | ADEpYLI <u>P</u> QQG  | P+3P       | 6              | 6           | 0           |
| EGFR-pY1069              | LQRpYSSD <u>P</u> TG  | P+4P       | 0              | 0           | 0           |
| EGFR-pY1092              | VPEpYI <u>N</u> QSVP  | P+2N       | 8              | 0           | 8           |
| EGFR-pY1110              | NPVpYH <u>N</u> QPLN  | P+2N, P+4P | 15             | 8           | 7           |
| EGFR-pY1125              | DPHpYQD <u>P</u> HST  | P+3P       | 1              | 1           | 0           |
| EGFR-pY1138              | NPEpYL <u>N</u> TVQP  | P+2N, P+4V | 7              | 6           | 1           |
| EGFR-pY1172              | NPDpYQQD <u>F</u> FP  | P+4F       | 8              | 7           | 1           |
| EGFR-pY1197              | NAEpYLR <u>V</u> APQ  | P+3V       | 0              | 0           | 0           |
| ErbB4-pY1035             | PPIpYTSRARI           |            | 0              | 0           | 0           |
| ErbB4-pY1066             | QFVpYRDGGFA           |            | 0              | 0           | 0           |
| ErbB4-pY1208             | EPLpYL <u>N</u> TFAN  | P+2N       | 11             | 9           | 2           |
| ErbB4-pY1221             | KAEpYLKNNIL           |            | 0              | 0           | 0           |
| ErbB4-pY1301             | PPPpYRHRNTV           |            | 0              | 0           | 0           |
|                          |                       | <b>Sum</b> | <b>152</b>     | <b>89</b>   | <b>63</b>   |

**Notes:**

# These peptides contain variations from the wt sequences to avoid confusion in classification; Each peptide contains an N-terminal ahx-ahx (where ahx is 6-aminohexanoic acid) linker for attachment of biotin and immobilization.

\* These pTyr sites are not reported as natural phosphorylation sites.

EGFR 869, 915 & 944 sites (*italicized*) are located in the kinase domain.

The peptide classification is based on the presence of an Asn at the P+2 or a hydrophobic residue at the P+3 or P+4 position.
